# Supplementary material for: Improved microwave absorption performance of a multi-dimensional Fe2O3/CNTCM@CN assembly achieved by enhanced dielectric relaxation
Source: Royal Society of Chemistry journal article supplement (doi:10.1039/d0tc00941e), 2020-01-01
Supplement: d0tc00941e1.pdf [file d0tc00941e1.pdf]

## Supporting Information

### **Boosted microwave absorption performance of multi-dimensional Fe<sub>2</sub>O<sub>3</sub>/CNTsCM@CN assembly by enhanced dielectric relaxation**

Xuefeng Yu,<sup>‡a</sup> Ying Zhang,<sup>‡a</sup> Lei Wang,<sup>a</sup> Linshen Xing,<sup>a</sup> Wenbin You,<sup>a</sup> Jiwei Liu,<sup>b</sup> Guanyu Chen,<sup>a</sup> Guangzhou Ding,<sup>a</sup> Jingjun Ding,<sup>a</sup> Xianhu Liu,<sup>c</sup> Min Wang,<sup>\*a</sup> Renchao Che<sup>\*a</sup>

[<sup>‡</sup>] The authors have contributed equally to this work

<sup>a</sup>Laboratory of Advanced Materials, Department of Materials Science and Collaborative Innovation Center of Chemistry for Energy Materials (iChem), Fudan University, Shanghai 200438, P.R. China

<sup>b</sup>School of Materials Science and Engineering, Changzhou University, Changzhou, Jiangsu 213164, People's Republic of China

<sup>c</sup>Key Laboratory of Materials Processing and Mold (Zhengzhou University), Ministry of Education, Zhengzhou 450002, China

\* E-mail: rcche@fudan.edu.cn

\* E-mail: minwang@fudan.edu.cn

## Figures

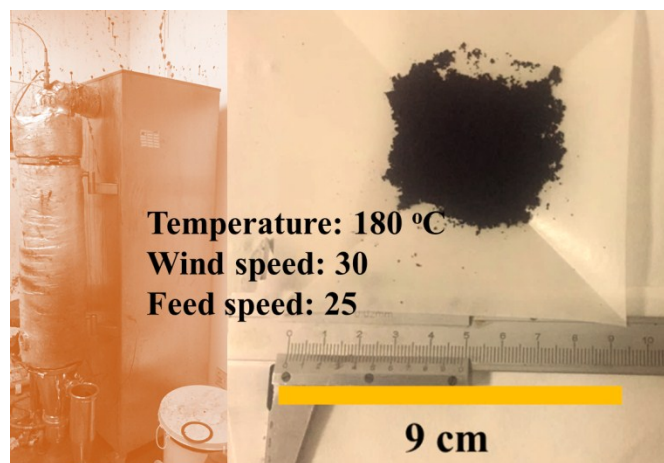

Fig S1. The digital photograph of spray-dried equipment and the corresponding synthesized products. Notably, the fabricated samples are large scale and cost-efficient for further application.

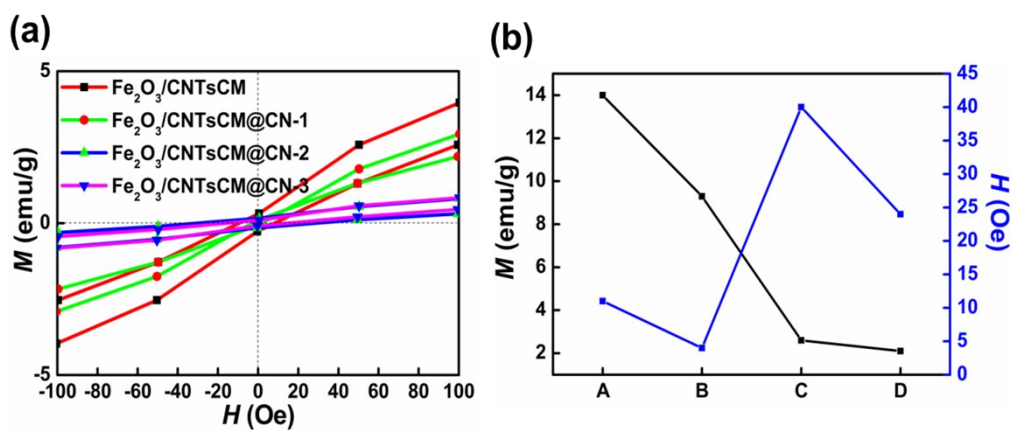

Fig S2. (a) The enlargement magnetic hysteresis loops from -100 Oe to 100 Oe and (b) the resulted magnetic parameters of as-fabricated samples: A  $\text{Fe}_2\text{O}_3/\text{CNTsCM}$ , B  $\text{Fe}_2\text{O}_3/\text{CNTsCM@CN-1}$ , C  $\text{Fe}_2\text{O}_3/\text{CNTsCM@CN-2}$ , and D  $\text{Fe}_2\text{O}_3/\text{CNTsCM@CN-3}$ .

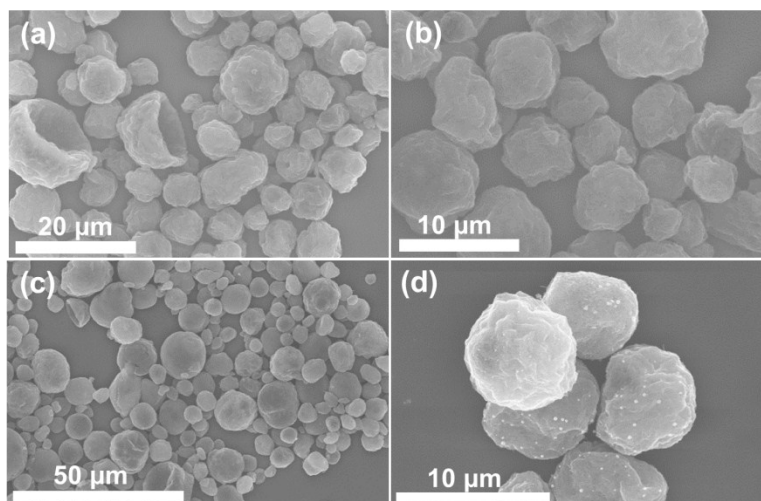

Fig S3. (a)-(b) The FFSEM image of Fe<sub>2</sub>O<sub>3</sub>/CNTsCM; (c)-(d) The FFSEM image of Fe<sub>2</sub>O<sub>3</sub>/CNTsCM@CN-1.

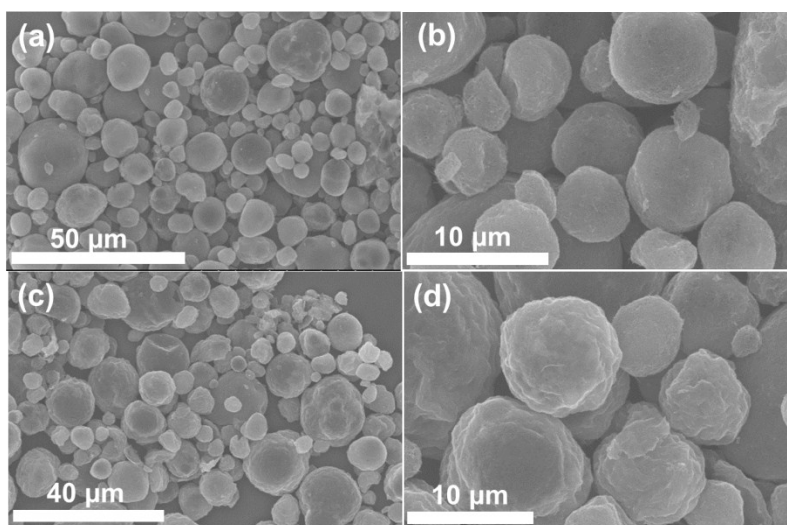

Fig S4. (a)-(b) The FFSEM image of Fe<sub>2</sub>O<sub>3</sub>/CNTsCM@-2; (c)-(d) The FFSEM image of Fe<sub>2</sub>O<sub>3</sub>/CNTsCM@CN-3.

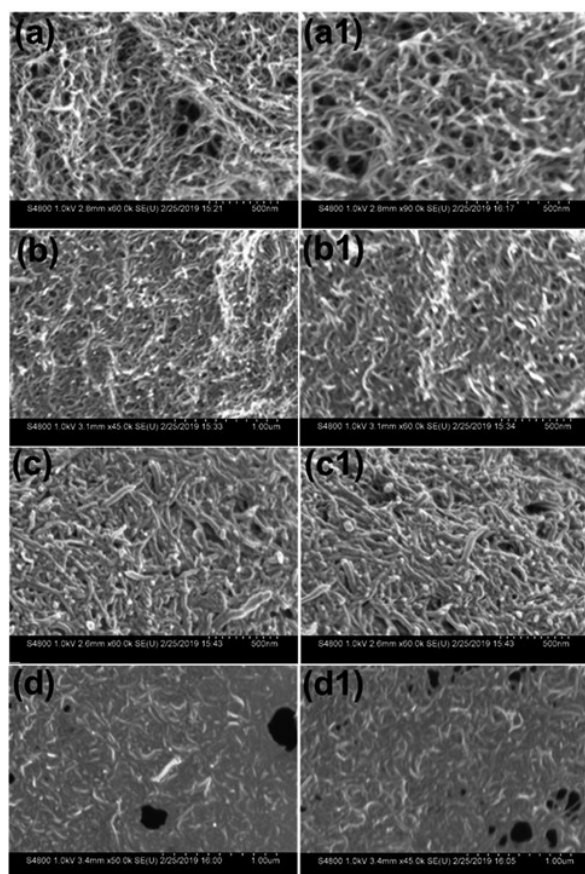

Fig S5. The SEM images of the detailed surface of (a-a1)  $\text{Fe}_2\text{O}_3/\text{CNTsCM}$ , (b-b1)  $\text{Fe}_2\text{O}_3/\text{CNTsCM}@ \text{CN-1}$ , (c-c1)  $\text{Fe}_2\text{O}_3/\text{CNTsCM}@ \text{CN-2}$ , and (d-d1)  $\text{Fe}_2\text{O}_3/\text{CNTsCM}@ \text{CN-3}$ .

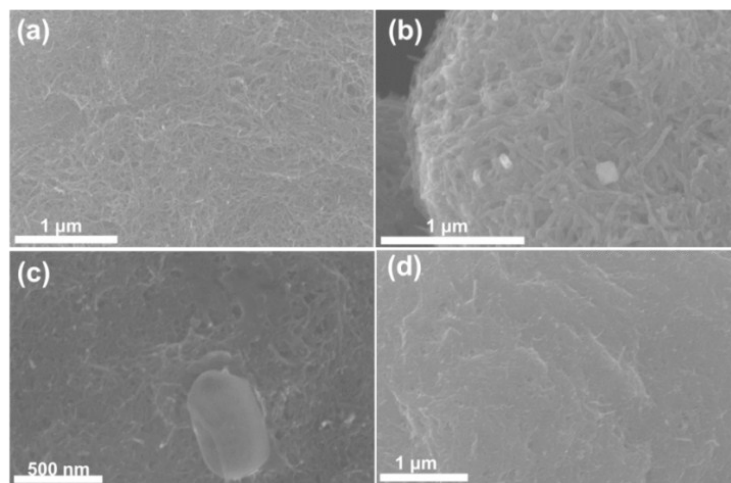

Fig S6. The FFSEM images of the detailed surface of (a)  $\text{Fe}_2\text{O}_3/\text{CNTsCM}$ , (b)  $\text{Fe}_2\text{O}_3/\text{CNTsCM}@ \text{CN-1}$ , (c)  $\text{Fe}_2\text{O}_3/\text{CNTsCM}@ \text{CN-2}$ , (d)  $\text{Fe}_2\text{O}_3/\text{CNTsCM}@ \text{CN-3}$ .

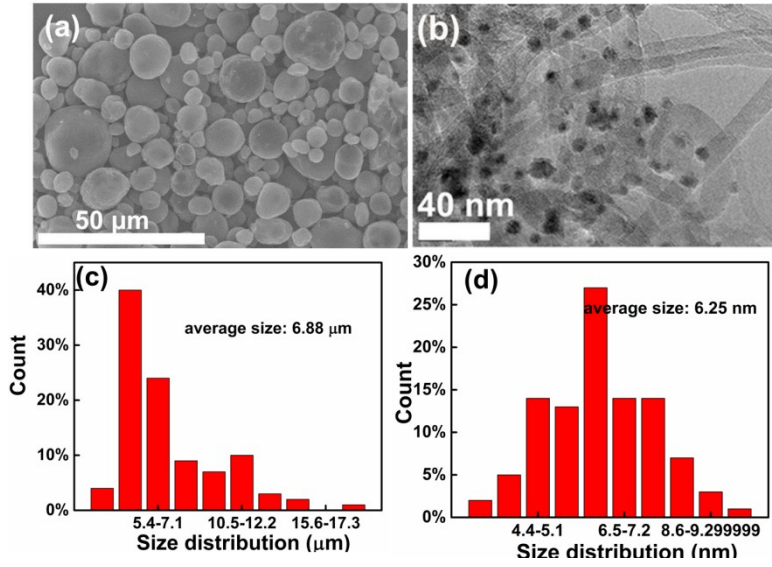

Fig S7. The SEM image (a) and TEM image (b) of  $\text{Fe}_2\text{O}_3/\text{CNTsCM}@CN-2$ . The corresponding size distribution (c)-(d) of  $\text{Fe}_2\text{O}_3/\text{CNTsCM}@CN-2$  sample.

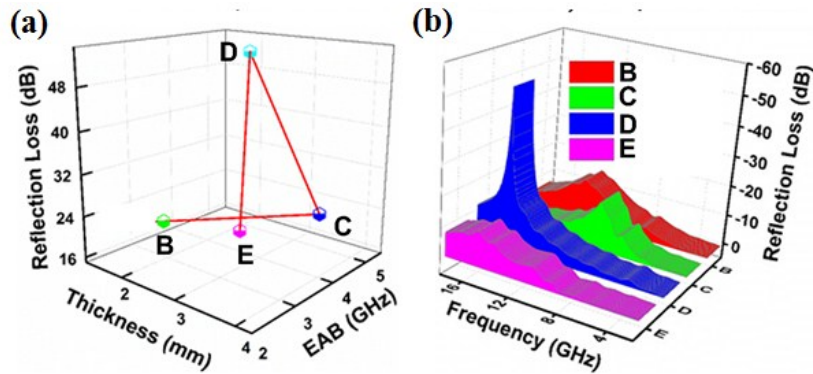

Fig S8. (a) The comprehensive comparison of the microwave absorption properties of as-prepared samples in the frequency range of 2–18 GHz. (b) The comparison of the maximum  $|\text{RL}|$  of hybrid composites at the same thickness of 2 mm. B  $\text{Fe}_2\text{O}_3/\text{CNTsCM}$ ; C  $\text{Fe}_2\text{O}_3/\text{CNTsCM}@CN-1$ ; D  $\text{Fe}_2\text{O}_3/\text{CNTsCM}@CN-2$ ; E  $\text{Fe}_2\text{O}_3/\text{CNTsCM}@CN-3$ .

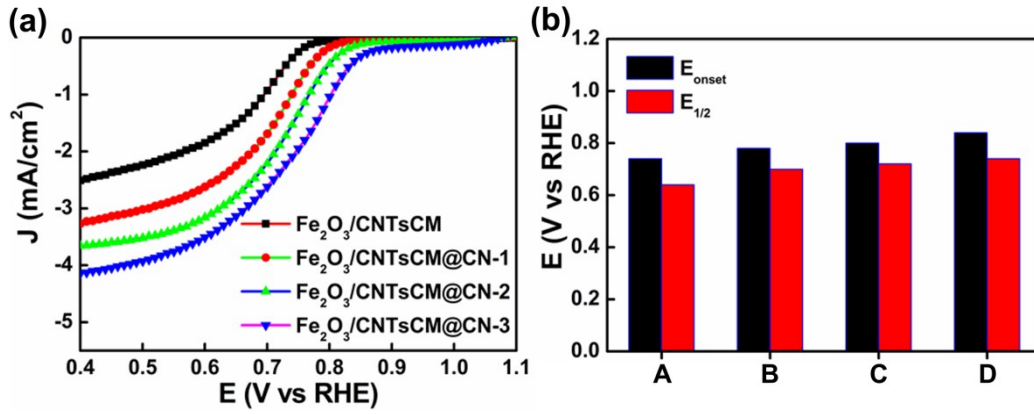

Fig S9. (a) The LSV curves of as-synthesized samples (ORR measurement); the ORR performance comparison among these samples: A  $\text{Fe}_2\text{O}_3/\text{CNTsCM}$ , B  $\text{Fe}_2\text{O}_3/\text{CNTsCM}@-1$ ; C  $\text{Fe}_2\text{O}_3/\text{CNTsCM}@-2$ ; D  $\text{Fe}_2\text{O}_3/\text{CNTsCM}@-3$ .

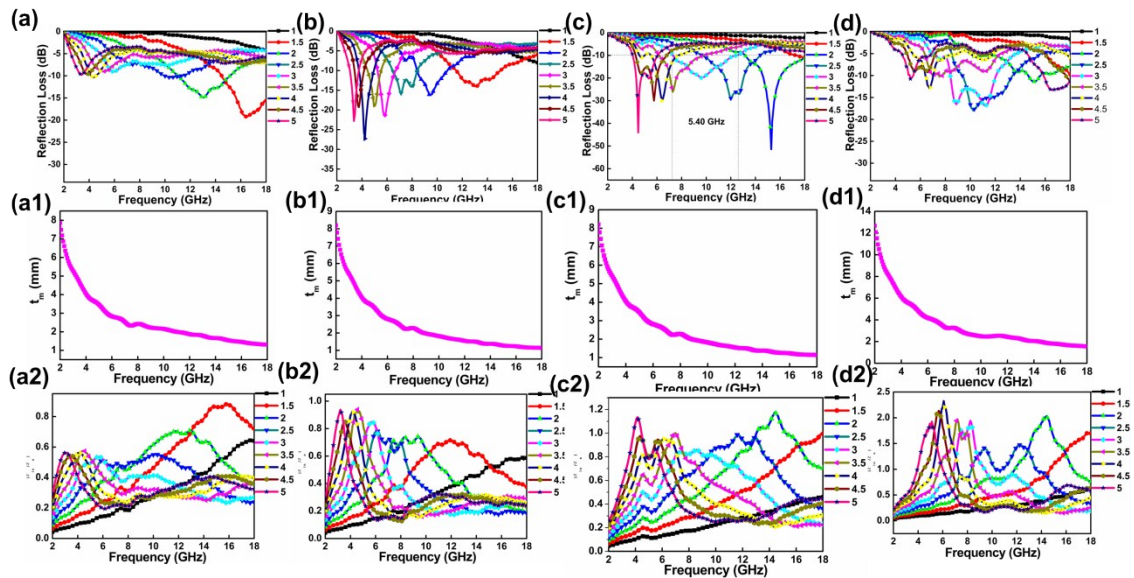

Fig S10. The reflection loss values of as-prepared composites with different thicknesses. (a)  $\text{Fe}_2\text{O}_3/\text{CNTsCM}$ , (b)  $\text{Fe}_2\text{O}_3/\text{CNTsCM}@-1$ , (c)  $\text{Fe}_2\text{O}_3/\text{CNTsCM}@-2$ , (d)  $\text{Fe}_2\text{O}_3/\text{CNTsCM}@-3$ ; the  $1/4 \lambda$  values of as-prepared composites that are related to the scattering and reflection loss: (a1)  $\text{Fe}_2\text{O}_3/\text{CNTsCM}$ , (b1)  $\text{Fe}_2\text{O}_3/\text{CNTsCM}@-1$ , (c1)  $\text{Fe}_2\text{O}_3/\text{CNTsCM}@-2$ , (d1)  $\text{Fe}_2\text{O}_3/\text{CNTsCM}@-3$ ; the calculated impedance matching value ( $Z=Z_{in}/Z_0$ ) of composites in the frequency range of 2-18 GHz. (a2)  $\text{Fe}_2\text{O}_3/\text{CNTsCM}$ , (b2)  $\text{Fe}_2\text{O}_3/\text{CNTsCM}@-1$ , (c2)  $\text{Fe}_2\text{O}_3/\text{CNTsCM}@-2$ , (d2)  $\text{Fe}_2\text{O}_3/\text{CNTsCM}@-3$ .

As is shown by Fig. S10a1-d1, the interrelationships between matching thickness ( $t_m$ ) and matching frequency ( $f_m$ ) can be illustrated by the  $1/4$  wavelength cancellation theories:

$$t_m = n\lambda/4 = \frac{nc}{4f_m\sqrt{|\mu_r||\epsilon_r|}} \quad (n=1, 3, 5 \dots)$$

In which  $f_m$  is the electromagnetic frequency,  $t_m$  is the matching thickness,  $c$  is the light velocity. Strikingly, benefited from the hierarchical assembly fabricated by the 0D  $\gamma$ - $\text{Fe}_2\text{O}_3$  nanoparticles, 1D carbon nanotubes (CNTs) and 2D N-doped carbon layer, the abundant reflection or scattering sites can be introduced to these composite systems. Considering the matching thickness satisfying with the 1/4 wavelength cancellation equation, the incident microwave can be reflected or scattered from these sites with opposite phases of  $180^\circ$ , thereby improving the electromagnetic energy dissipation. To sum up, induced by the unique structure-performance effect, the reflection loss and scattering loss of the micron-scale composite materials can be largely strengthened, which is more beneficial for the total microwave absorption.

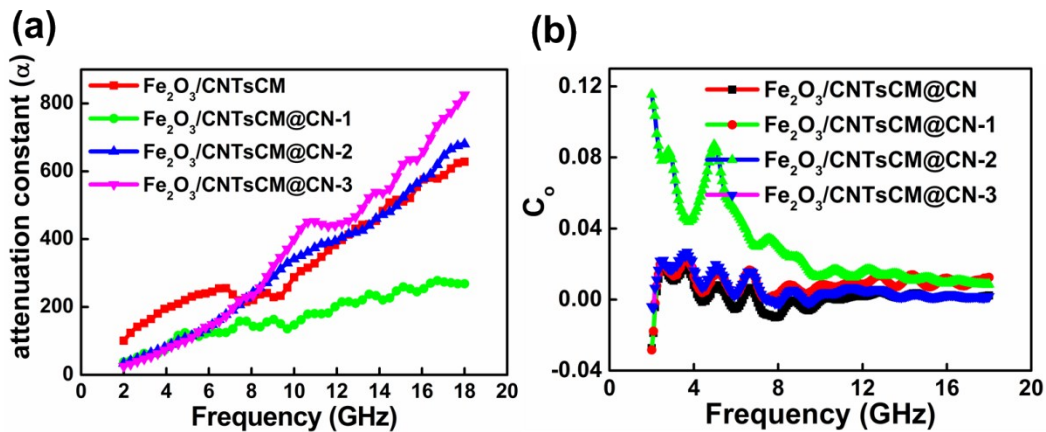

Fig S11. (a) The  $C_o$  values, (b) the attenuation constant factor  $\alpha$  of these as-synthesized samples in the frequency range of 2-18 GHz.

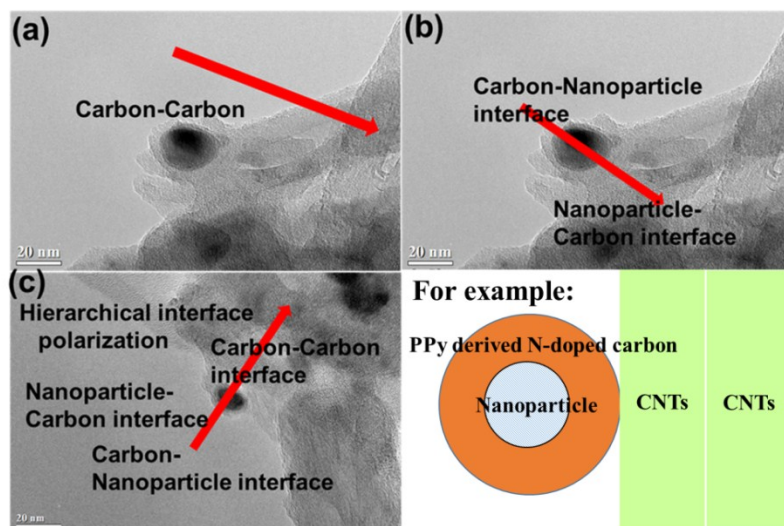

Fig S12. The TEM picture of hierarchical polarized heterojunction interfaces marked by red arrow. (a) Carbon-carbon interface (b) Carbon-nanoparticles-carbon-carbon interfaces (c) hierarchical heterojunction interfaces (d) The schematics diagram for hierarchical polarized heterojunction interfaces.

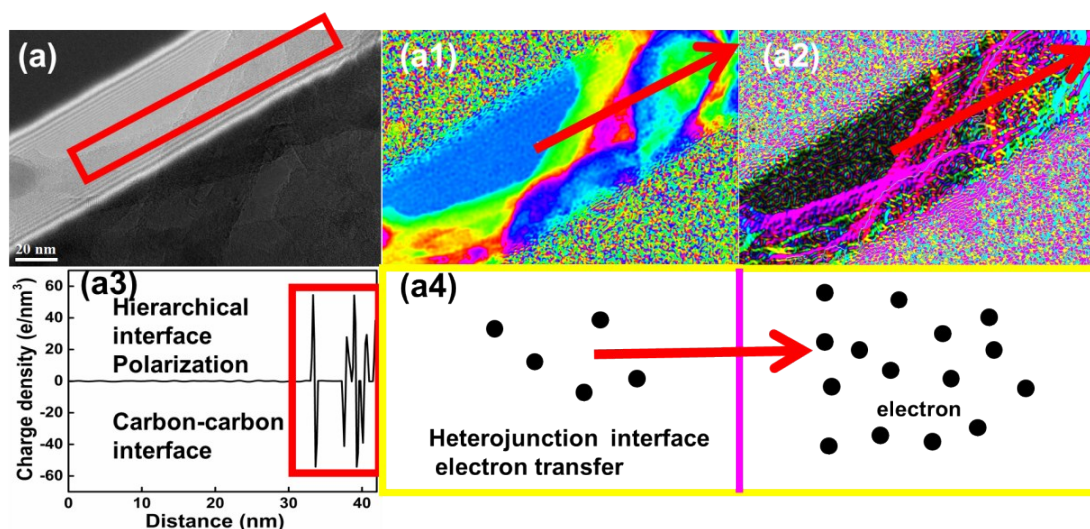

Fig S13. As exemplified by  $\text{Fe}_2\text{O}_3/\text{CNTsCM@CN-2}$ , (a) Off-axis electron holograms; (a1) reconstructed phase image; (a2) electric field distribution picture (The different color variations indicate the direction of the built-in electric field, and the intensity of the same type color indicates the intensity of the built-in electric field); (a3) the corresponding profile lines of charge density. (a4) The schematics diagram for the electron transfer along with the polarization heterojunction interface. Clearly, a lot of interface polarization relaxation can be introduced benefiting from the unique structure assembly.

To clarify interfacial polarization effect, the related charge density distribution of  $\text{Fe}_2\text{O}_3/\text{CNTsCM@CN-2}$  composite was revealed by off-axis

electron holography (Fig. S13). Implementing with the follow-up treatment of hologram images (Fig. S13a), the corresponding electrostatic potential information can be further analyzed in view of the Poisson's equation (Fig. S13a1). Exemplified by CNTs-CNTs interfaces in Fig. S13a3, the strong charge transfer behaviors along with the heterojunction interfaces can happen on, resulting in the charge redistribution. For as-synthesized  $\text{Fe}_2\text{O}_3/\text{CNTsCM@CN}$  composites, attributed to the forcibly-assembled strategy the abundant heterojunction interfaces, among 2D N-doped carbon, 0D  $\gamma\text{-Fe}_2\text{O}_3$  and 1D CNTs, can be generated. These tight contacting can mainly include CNTs-CNTs interface, CNTs-nanoparticles interface, N-doped carbon layers-CNTs interface, N-doped carbon layers-nanoparticles interface, and N-doped carbon layers-nanoparticles-N-doped carbon layers-CNTs-CNTs interface and so on. As a result, a great deal of built-in electric field in these hybrid systems has been constructed, ultimately boosting interfacial polarization effect.

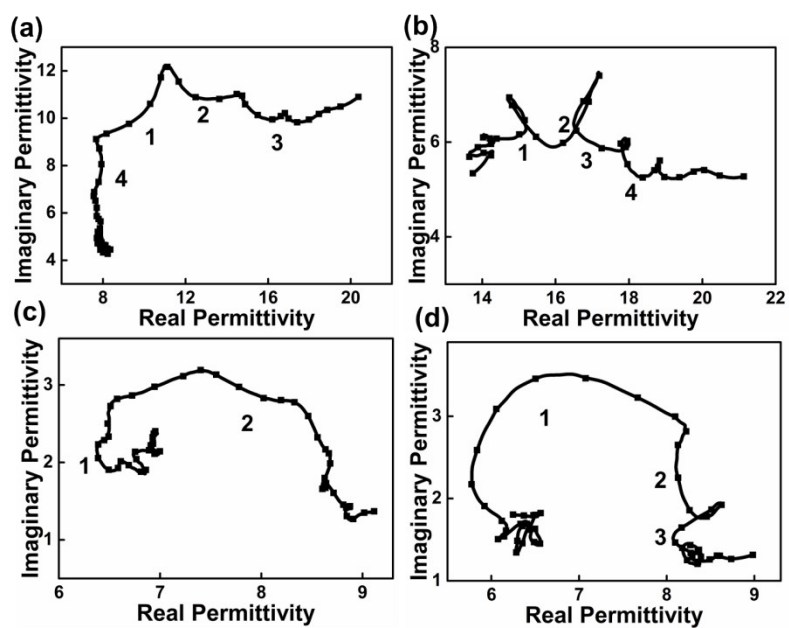

Fig S14. The typical Cole-Cole semicircles of as-fabricated composite samples in 2-18 GHz: (a)  $\text{Fe}_2\text{O}_3/\text{CNTsCM}$ ; (b)  $\text{Fe}_2\text{O}_3/\text{CNTsCM}@-1$ ; (c)  $\text{Fe}_2\text{O}_3/\text{CNTsCM}@-2$ ; (d)  $\text{Fe}_2\text{O}_3/\text{CNTsCM}@-3$ .

Table S1. The compared microwave absorption performances of as-synthesized samples and other carbon-based nanomaterials.

| Absorber                                                             | Synthetic method                                                          | Mass ratio<br>(wt %) | Measured<br>thickness<br>(mm) | RL <sub>min</sub> Values (dB) | absorption band (GHz) (RL < -10<br>dB) from 1.00 to 5.00 mm | refs   |
|----------------------------------------------------------------------|---------------------------------------------------------------------------|----------------------|-------------------------------|-------------------------------|-------------------------------------------------------------|--------|
| monodisperse<br>Fe <sub>3</sub> O <sub>4</sub> /C nanosheets         | carbothermal<br>reduction preparation                                     | —                    | 4.3 mm                        | -43.95 dB                     | 12.7 GHz                                                    | 22     |
| composite<br>graphene aerogel                                        | surface and interface reinforce<br>approach                               | 15 %                 | 4.0 mm                        | -49 dB                        | 13.6 GHz                                                    | 43     |
| Fe/Fe <sub>3</sub> C@NCNTs-<br>600                                   | direct pyrolysis<br>method                                                | 30 %                 | 4.97 mm                       | -46.0 dB                      | 14.8 GHz                                                    | 44     |
| porous Fe <sub>3</sub> O <sub>4</sub> /<br>carbon fiber              | graphitization<br>Process of bagasse waste                                | 30 %                 | 1.9 mm                        | -48.2 dB                      | 13.8 GHz                                                    | 45     |
| Fe <sub>3</sub> O <sub>4</sub> /graphene<br>capsules                 | catalytic chemical<br>vapor deposition (CCVD) and<br>hydrothermal process | 30 %                 | 3.5 mm                        | -32 dB                        | 11.6 GHz                                                    | 46     |
| FeCo alloy/carbon<br>composites                                      | in situ pyrolysis<br>of Prussian blue analogues                           | 40 %                 | 2 mm                          | -33 dB                        | 14.8 GHz                                                    | 47     |
| Graphene/Fe <sub>3</sub> O <sub>4</sub><br>aerogel microspheres      | electrospinning-freeze drying                                             | 5 %                  | 4.0 mm                        | -51.5 dB                      | —                                                           | 48     |
| 3D porous<br>carbon/Fe <sub>3</sub> O <sub>4</sub> @Fe<br>composites | carbonization process of<br>loofah sponge                                 | 30 %                 | 2 mm                          | -49.6 dB                      | —                                                           | 49     |
| ACHFs-CNTs-Fe <sub>3</sub> O <sub>4</sub>                            | chemical vapor deposition                                                 | 28 %                 | 2.5 mm                        | -46.828 dB                    | 13.54 GHz                                                   | 50     |
| PVDF/Fe <sub>3</sub> O <sub>4</sub> @PPy                             | electrospinning                                                           | —                    | 2.5 mm                        | -21.5 dB                      | 13.2 GHz                                                    | 51     |
| biomass-derived<br>porous carbon<br>materials foam                   | sol-gel and carbonization<br>process                                      | 30 %                 | 4.7 mm                        | -43.6 dB                      | —                                                           | 52     |
| carbon cloth<br>substrate@ZnO                                        | in situ orientation growth<br>process                                     | 40%                  | 3.5 mm                        | -43.7 dB                      | 10.04 GHz                                                   | 53     |
| Fe <sub>2</sub> O <sub>3</sub> /CNTs@CN-2                            | Spray-drying method                                                       | 10 %                 | 2.0 mm                        | -51.5 dB                      | 14.01 GHz                                                   | herein |
